# Supplementary material for: Au/BiPO4 nanorod catalysts: synthesis, characterization and their catalytic performance for CO oxidation
Source: Royal Society of Chemistry journal article supplement (doi:10.1039/c6ra00399k), 2016-01-01
Supplement: c6ra00399k1.pdf [file c6ra00399k1.pdf]

## Supporting Information for

### **Au/BiPO<sub>4</sub> nanorod catalysts: synthesis, characterization and their catalytic performance for CO oxidation**

Ping Zhang, Huanhuan Yu, Jingjing Li, Hang Zhao, Baolin Zhu, Weiping Huang, Shoumin Zhang\*

*Key Laboratory of Advanced Energy Material Chemistry (MOE), Tianjin Key Lab of Metal and Molecule Based Material Chemistry, College of Chemistry, Nankai University, Tianjin 300071, P. R. China*

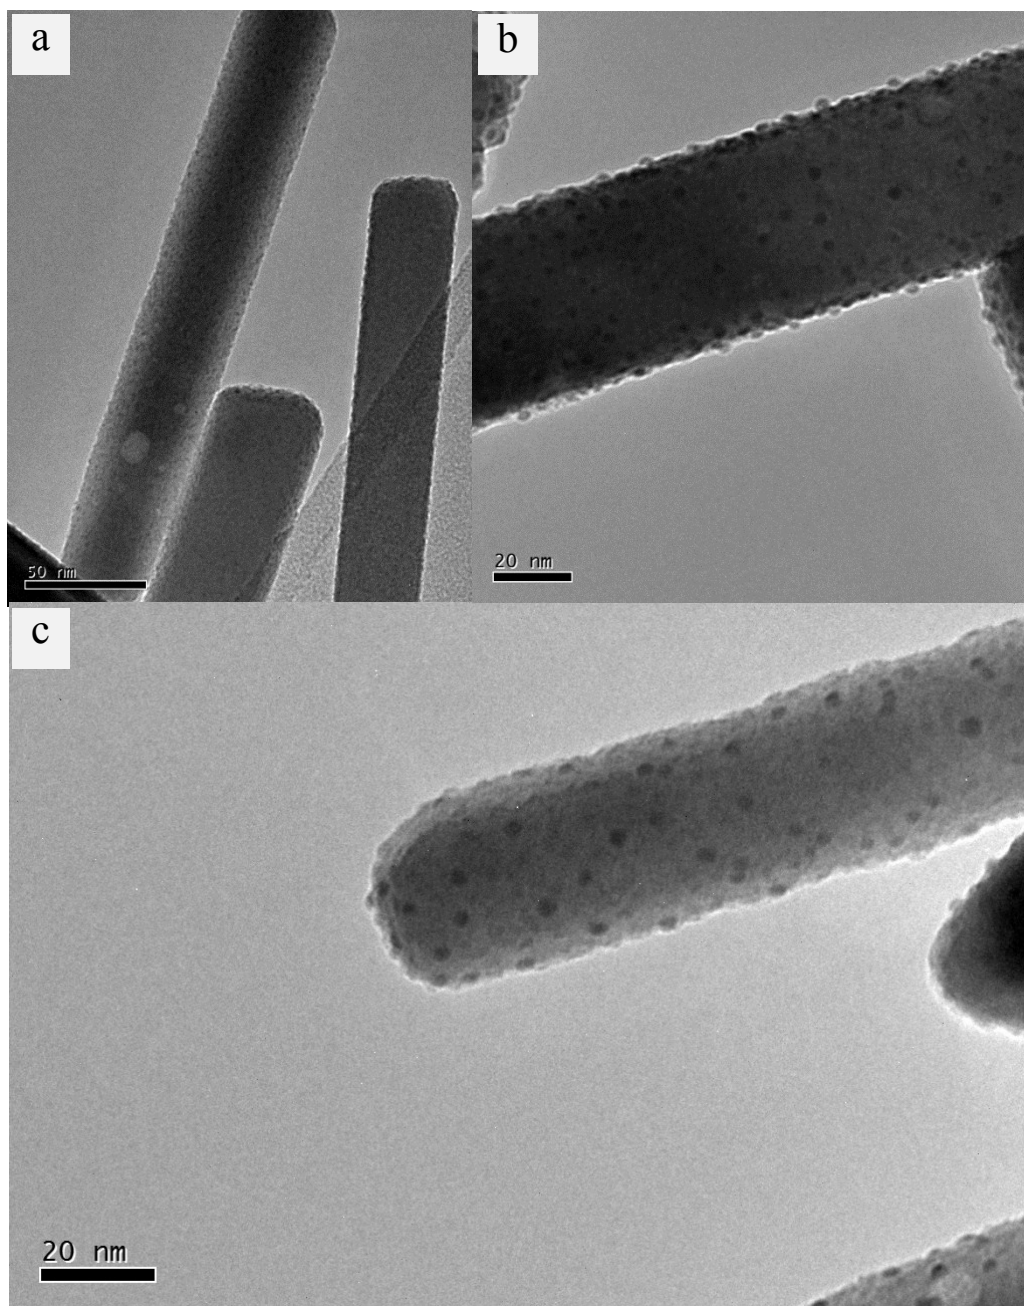

Fig S1 BiPO<sub>4</sub> support(a) and 1.5% Au/BiPO<sub>4</sub> calcined at (b)80°C; (c) 200°C.

It is obvious that the BiPO<sub>4</sub> support were of nanrods structure with diameters about 50 nm. It could also be seen that gold nanoparticles(~2 nm) highly dispersed on the surface of BiPO<sub>4</sub> nanorods when Au/BiPO<sub>4</sub> catalyst were calcined at 80°C and 200°C.

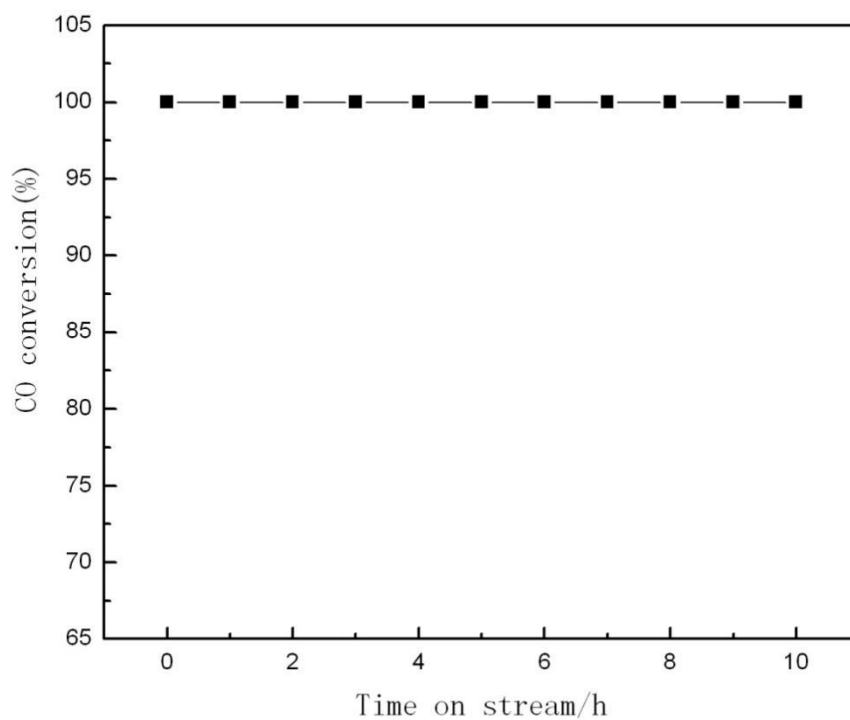

*Fig.S2* The stability of 1.5% Au/ BiPO<sub>4</sub> for the CO oxidation , reaction temperature: 40°C

As seen in this *Fig.S2*, the catalyst still kept 100% conversion without any loss. It indicated that the Au/BiPO<sub>4</sub> catalyst had a highly stability for 10 h at 40°C ( $T_{100\%}$ ).

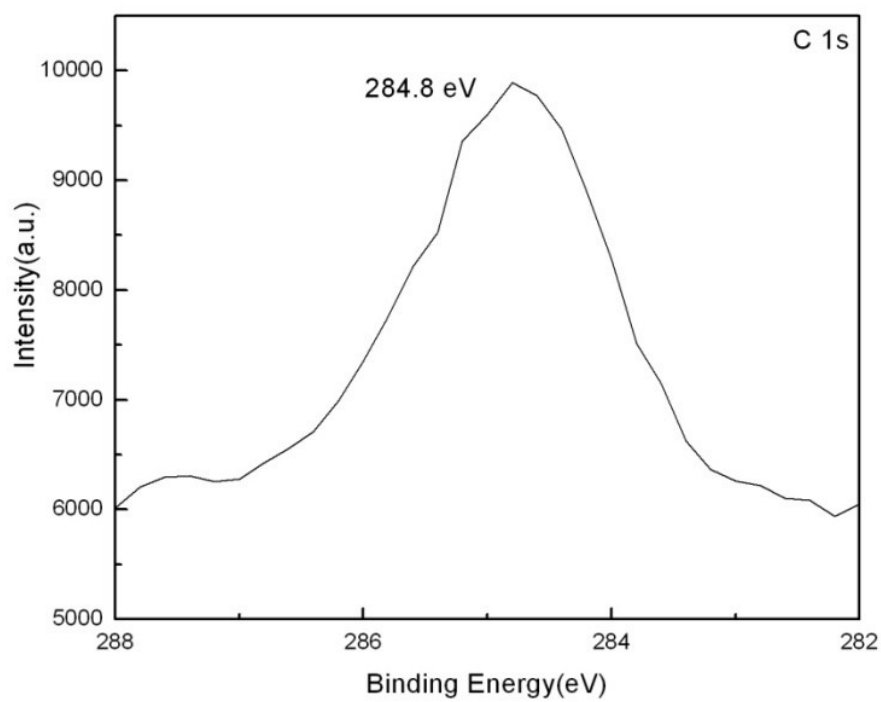

*Fig.S3* The XPS spectra of C 1s(284.8eV)
